# Supplementary material
Source: publisher figshare collection journal article supplement (https://plos.figshare.com/articles/dataset/_/137062)
Supplement: Supplementary file 1 [file 1 › Table_S1.pdf]

**Table 1:** Model variables.

| Variable           | Meaning                                            | Dimension              |
|--------------------|----------------------------------------------------|------------------------|
| $t$                | time                                               | sec                    |
| $\vec{r}$          | two-dimensional coordinate                         | $\mu\text{m}$          |
| $s$                | arc length along the cell boundary                 | $\mu\text{m}$          |
| $M(\vec{r}, t)$    | myosin concentration                               | units/ $\mu\text{m}^2$ |
| $\vec{U}(\vec{r})$ | local F-actin flow velocity                        | $\mu\text{m}/\text{s}$ |
| $\vec{n}(\vec{r})$ | local normal unit vector to the lamellipodial edge | non-dimensional        |
| $A(\vec{r}, t)$    | adhesion concentration                             | non-dimensional        |
| $a(\vec{r}, t)$    | F-actin density                                    | non-dimensional        |
| $v(s)$             | net local protrusion/retraction rate               | $\mu\text{m}/\text{s}$ |
| $V_p(s)$           | local polymerization rate                          | $\mu\text{m}/\text{s}$ |
