# Supplementary material
Source: publisher figshare collection journal article supplement (https://plos.figshare.com/articles/dataset/_/137062)
Supplement: Supplementary file 1 [file 1 › Table_S2.pdf]

**Table 2:** Constant model parameters.

| Parameter | Meaning                                | Value                           |
|-----------|----------------------------------------|---------------------------------|
| $M$       | total myosin                           | 55 units                        |
| $D_M$     | effective myosin diffusion coefficient | $0.8 \mu\text{m}^2/\text{s}$    |
| $D_A$     | small adhesion diffusion coefficient   | $0.2 \mu\text{m}^2/\text{s}$    |
| $D_a$     | small actin diffusion coefficient      | $0.2 \mu\text{m}^2/\text{s}$    |
| $\mu$     | shear F-actin viscosity                | $2 \text{ kPa}\times\text{s}$   |
| $\mu_b$   | bulk F-actin viscosity                 | $100 \text{ kPa}\times\text{s}$ |
| $S_A$     | adhesion assembly rate                 | 1 unit/50 s                     |
