# Supplementary material
Source: publisher figshare collection journal article supplement (https://plos.figshare.com/articles/dataset/_/137062)
Supplement: Supplementary file 1 [file 1 › Table_S3.pdf]

**Table 3:** Model parameters dependent on adhesion strength.

| Parameter                                      | Meaning                                                                              | Low  | Medium | High  |
|------------------------------------------------|--------------------------------------------------------------------------------------|------|--------|-------|
| $\zeta$ [nN $\times$ s/ $\mu$ m <sup>4</sup> ] | adhesion drag coefficient                                                            | 0.04 | 0.2    | 20    |
| $\vartheta$ [non-dim]                          | flow-coupling coefficient                                                            | 0.9  | 0.4    | 0.2   |
| $\gamma$ [1/s]                                 | adhesion disassembly rate                                                            | 1/50 | 1/150  | 1/250 |
| $v$ [1/s]                                      | actin disassembly rate                                                               | 1/50 | 1/50   | 1/100 |
| $\alpha$ [1 unit $\times\mu$ m/s]              | F-actin assembly rate                                                                | 2    | 0.4    | 0.4   |
| $M_0$ [non-dim]                                | threshold myosin density for myosin-mediated actin depolymerization                  | 140  | 20     | 200   |
| $A_0$ [non-dim]                                | threshold adhesion density for adhesion-dependent inhibition of actin polymerization | 0.01 | 1      | 0.2   |
