# Supplementary material
Source: publisher figshare collection journal article supplement (https://plos.figshare.com/articles/dataset/_/137062)
Supplement: Supplementary file 1 [file 1 › Table_S4.pdf]

**Table 4:** Model parameters dependent on myosin strength.

| Parameter | Meaning                  | Blebbistatin | Control | Calyculin |
|-----------|--------------------------|--------------|---------|-----------|
| $k$ [pN]  | myosin force coefficient | 45           | 100     | 130       |
