# Supplementary material
Source: publisher figshare collection journal article supplement (https://plos.figshare.com/articles/dataset/_/137062)
Supplement: Supplementary file 1 [file 1 › Table_S5.pdf]

**Table 5:** Model parameters dependent on adhesion and myosin strength.

| Param.                                   | Meaning       | Cont<br>Low | Cont<br>Med | Cont<br>High | Caly<br>Low | Caly<br>Med | Caly<br>High | Bleb<br>Low | Bleb<br>Med | Bleb<br>High |
|------------------------------------------|---------------|-------------|-------------|--------------|-------------|-------------|--------------|-------------|-------------|--------------|
| $\bar{A}$ [ $\mu\text{m}^2$ ]            | cell area     | 300         | 460         | 513          | 297         | 383         | 397          | 470         | 434         | 456          |
| $V_{cell}$<br>[ $\mu\text{m}/\text{s}$ ] | cell<br>speed | 0.12        | 0.20        | 0.08         | 0.16        | 0.22        | 0.08         | 0.10        | 0.15        | 0.16         |
